# Supplementary material for: A rare metal–organic 3D architecture with a pseudo-primitive cubic topology with double edges constructed from a 12-connected SBU
Source: Royal Society of Chemistry journal article supplement (doi:10.1039/b504917b), 2005-01-01
Supplement: b504917b.pdf [file b504917b.pdf]

## A rare metal-organic 3D architecture with a pseudo-primitive cubic topology with double edges constructed from a 12-connected SBU

Yi-Hang Wen,<sup>a,b,c</sup> Jian Zhang,<sup>a,c</sup> Xiao-Qin Wang,<sup>a,c</sup> Yun-Long Feng,<sup>b</sup> Jian-kai Cheng,<sup>a</sup> Zhao-Ji Li<sup>a</sup> and Yuan-Gen Yao<sup>\*a</sup>

<sup>a</sup> State Key Laboratory of Structural Chemistry, Fujian Institute of Research on the Structure of Matter, The Chinese Academy of Sciences, Fuzhou, Fujian, 350002, P. R. China.

Fax: +86-591-83714946; Tel: +86-591-83711523; E-mail: [yvg@ms.fjirsm.ac.cn](mailto:yvg@ms.fjirsm.ac.cn)

<sup>b</sup> Institute of Physical Chemistry, Zhejiang Key Laboratory for Reactive Chemistry on Solid Surfaces, Zhejiang Normal University, Jinhua, Zhejiang, 321004, P. R. China.

<sup>c</sup> Graduate School of Chinese Academy of Sciences, Beijing 100039, P. R. China.

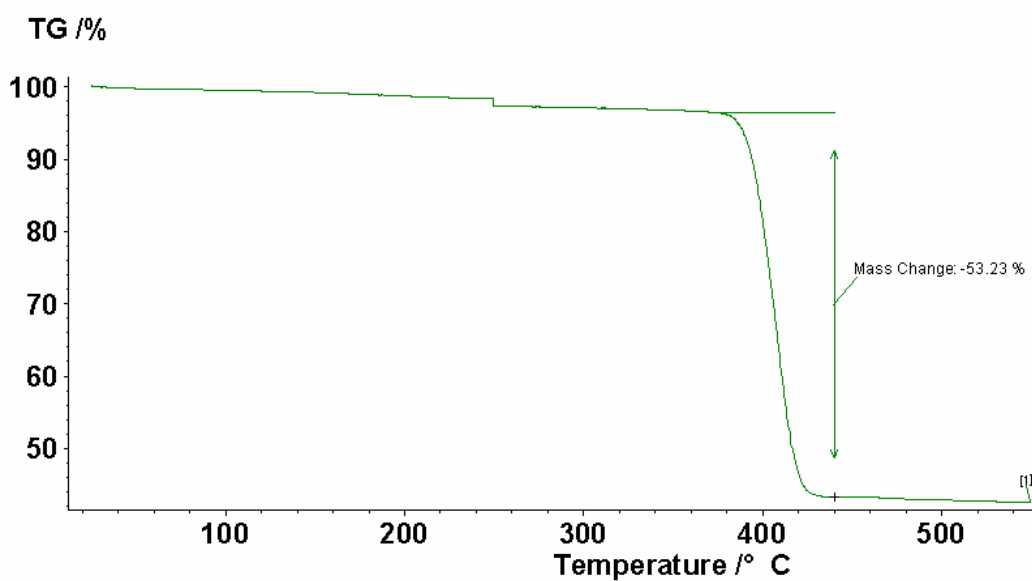

Fig. S1 The TGA curve of complex 1 during heating in N<sub>2</sub>.

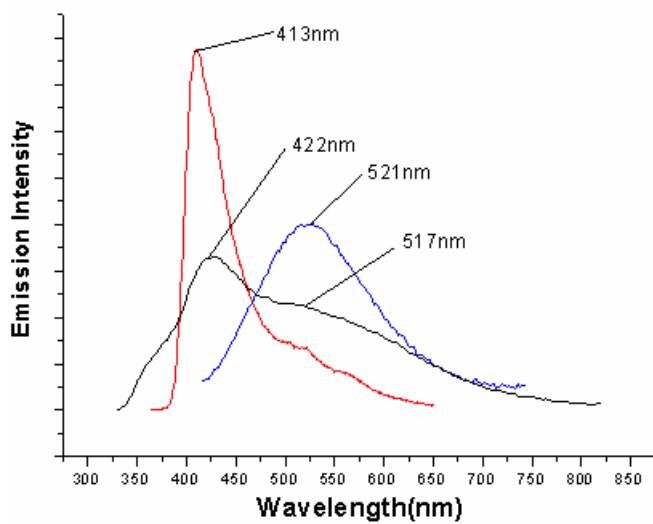

Fig. S2. The solid-emission spectra of **1** (black), H<sub>2</sub>ip (red) and bpp (blue) recorded at room temperature.
